# Supplementary material
Source: PubMed Central journal article supplement (PMC4754785)
Supplement: NIHMS733290-supplement-01.pdf [file NIHMS733290-supplement-01.pdf]

## Supplemental Data

Supplementary Table 1: Primers and Taqman hydrolysis probe used for ANDV detection

| Oligonucleotide name | Oligonucleotide sequence      | Sense* | Localization | Tm     |
|----------------------|-------------------------------|--------|--------------|--------|
| AF004660             |                               |        |              |        |
| ANDV-Forward         | GCAGCTGTGTCTACATTGGAGAC       | S      | 187-209      | 57.3°C |
| ANDV-Reverse         | GCTCCTATAGCCTTCCAATCAGC       | A      | 413-391      | 58.7°C |
| Taqman Probe         | FAM-ACAAAACCAGTTGATCCA-MGBNFQ | S      | 268-285      | 66.5°C |

\* S= sense, A= antisense

Supplementary Table 2 Reaction conditions for ANDV RT-qPCR assays.

|                                        | Two-step RT-qPCR                           |                                            | One-step RT-PCR                                          |                                                          |
|----------------------------------------|--------------------------------------------|--------------------------------------------|----------------------------------------------------------|----------------------------------------------------------|
| <b>Platforms</b>                       | 480 LightCycler                            | LightCycler 2.0                            | 480 LightCycler                                          | LightCycler 2.0                                          |
| <b>Reaction volume</b>                 | 10 µL                                      | 10 µL                                      | 10 µL                                                    | 10 µL                                                    |
| <b>Reverse Transcriptase</b>           | MMLV enzyme <sup>1</sup>                   | MMLV enzyme <sup>1</sup>                   | Tth DNA Polymerase <sup>2</sup>                          | Tth DNA Polymerase <sup>2</sup>                          |
| <b>PCR kit</b>                         | LightCycler TaqMan Master kit <sup>2</sup> | LightCycler TaqMan Master kit <sup>2</sup> | LightCycler 480 RNA Master Hydrolysis Probe <sup>2</sup> | LightCycler 480 RNA Master Hydrolysis Probe <sup>2</sup> |
| <b>Primer (final concentration)</b>    | 0,3 mM                                     | 0,3 mM                                     | 0,3 mM                                                   | 0,3 mM                                                   |
| <b>MGB probe (final concentration)</b> | 0,3 mM                                     | 0,3 mM                                     | 0,3 mM                                                   | 0,3 mM                                                   |

|                                         |                         |                                                                          |                         |                                                                       |
|-----------------------------------------|-------------------------|--------------------------------------------------------------------------|-------------------------|-----------------------------------------------------------------------|
| <b>Master Mix (final concentration)</b> | 1X                      | 1X                                                                       | 1X                      | 1X                                                                    |
| <b>Mn(OAc)<sub>2</sub></b>              | ∅                       | ∅                                                                        | 3,25 mM                 | 3,25 mM                                                               |
| <b>Template</b>                         | 1 µL cDNA               | 1 µL cDNA                                                                | 1 µL RNA                | 1 µL RNA                                                              |
| Cycling conditions                      |                         |                                                                          |                         |                                                                       |
|                                         | <b>Two-Step RT-qPCR</b> |                                                                          | <b>One-Step RT-qPCR</b> |                                                                       |
| Reverse Transcription                   |                         | 72°C, 10min<br>4°C, 5 min<br>42°C, 1h<br>70°C, 15 min<br>4°C, ∞          |                         | 63°C, 3 min                                                           |
| Time Real PCR                           | Denaturation            | 95°C, 10 min,<br>Ramp 20°C/seg,<br>Fluorescence<br>Acquisition: none     | Denaturation            | 95°C, 10 min,<br>Ramp 20°C/seg,<br>Fluorescence<br>Acquisition: none  |
| 40 repeats                              | Amplification           | 95°C, 10 seg,<br>Ramp 20°C/seg,<br>Fluorescence<br>Acquisition: none     | Amplification           | 95°C, 10 seg,<br>Ramp 20°C/seg,<br>Fluorescence<br>Acquisition: none  |
|                                         | Annealing               | 60°C, 30 seg,<br>Ramp 20°C/seg,<br>Fluorescence<br>Acquisition: none     | Annealing               | 60°C, 30 seg,<br>Ramp 20°C/seg,<br>Fluorescence<br>Acquisition: none  |
|                                         | Extension               | 72°C, 1 seg,<br>Ramp 20°C/seg,<br>Fluorescence<br>Acquisition:<br>single | Extension               | 72°C, 1 seg, Ramp<br>20°C/seg,<br>Fluorescence<br>Acquisition: single |

<sup>1</sup>Invitrogen, CA, USA.

<sup>2</sup> Roche Appl Biosc, IN, USA

Supplementary Table 3: Efficiency for one step and two step reactions in two real time platforms

| Platform       | LC 2.0       |               |                  | LC 480       |               |
|----------------|--------------|---------------|------------------|--------------|---------------|
| Assay          | RNA one-step | cDNA two-step | plasmid two-step | RNA one-step | cDNA two-step |
| Efficiency (%) | 82.7         | 91.8          | 97.3             | 63.6         | 93.5          |
